# 1 **Connexins evolved after early chordates lost innexin diversity**

2

## 3 **Authors:**

4 Georg Welzel<sup>1\*</sup> and Stefan Schuster<sup>1</sup>

## 5 **Affiliations:**

6 <sup>1</sup> Department of Animal Physiology, University of Bayreuth, Universitätsstrasse 30, 95447

7 Bayreuth, Germany

8 \*Correspondence to Georg Welzel: [georg.welzel@uni-bayreuth.de](mailto:georg.welzel@uni-bayreuth.de)

9

10

## 11 **Abstract**

12 Gap junction channels are formed by two unrelated protein families. Non-chordates use the  
13 primordial innexins, while chordates use connexins that superseded the gap junction function  
14 of innexins. Chordates retained innexin-homologs, but N-glycosylation prevents them from  
15 forming gap junctions. It is puzzling why chordates seem to exclusively use the new gap  
16 junction protein and why no chordates should exist that use non-glycosylated innexins to form  
17 gap junctions. Here, we identified glycosylation sites of 2270 innexins from 152 non-chordate  
18 and 274 chordate species. Among all chordates, we found not a single innexin without  
19 glycosylation sites. Surprisingly, the glycosylation motif is also widespread among non-  
20 chordate innexins indicating that glycosylated innexins are not a novelty of chordates. In  
21 addition, we discovered a loss of innexin diversity during the early chordate evolution. Most  
22 importantly, the most basal living chordates, which lack connexins, exclusively possess  
23 innexins with glycosylation sites. A bottleneck effect might thus explain why connexins have  
24 become the only protein used to form chordate gap junctions.

## 25 **Introduction**

26 Animals from hydra to human use gap junction channels to couple adjacent cells and thus  
27 enable direct intercellular communication. Interestingly, gap junction channels are formed by  
28 two unrelated integral membrane proteins: innexins and connexins. The innexins are the  
29 primordial gap junction proteins that have been identified in all eumetazoans except sponges,  
30 placozoa and echinoderms (Slivko-Koltchik et al., 2019). The connexins arose *de novo* during  
31 the early chordate evolution and constitute the gap junction channels of all living chordates  
32 except lancelets (Abascal et al., 2013; Mikalsen et al., 2021; Slivko-Koltchik et al., 2019).  
33 Despite the lack of sequence homology (Alexopoulos et al., 2004), the topology (Maeda et al.,  
34 2009; Michalski et al., 2020; Oshima et al., 2016) (Figure 1A, B) and function (Pereda et al.,  
35 2017; Skerrett et al., 2017) of connexin- and innexin-based gap junction channels are  
36 remarkably similar. Nevertheless, it is thought that chordates have completely replaced the  
37 innexin-based gap junctions by the novel connexin-based gap junctions. Vertebrates still  
38 express innexin-homologs (Baranova et al., 2004; Panchin et al., 2000), called pannexins, but  
39 it is supposed that they stopped forming gap junctions and since then only function as non-  
40 junctional membrane channels (Dahl et al., 2014; Esseltine et al., 2016; Sosinsky et al., 2011).  
41 This hypothesis is based on the discovery that the three pannexins of humans and mice are  
42 glycoproteins. Each of the pannexins contains an identified consensus motif (Asn-X-Ser/Thr)  
43 for asparagine (N)-linked glycosylation within either the first or the second extracellular loop  
44 (Penuela et al., 2007; Penuela, Simek, et al., 2014; Ruan et al., 2020; Sanchez-Pupo et al., 2018).  
45 This enables the posttranslational attachment of sugar moieties at the asparagine residue within  
46 the consensus sequence which hinders two pannexin channels of adjacent cells to form  
47 intercellular channels (Ruan et al., 2020) (Figure 1C). Based on these findings, it has been  
48 assumed that each vertebrate pannexin is equipped with a N-linked glycosylation site (NGS)  
49 and thus lost its gap junction function (Sosinsky et al., 2011). However, it remains unclear  
50 whether really all vertebrate pannexins are glycosylated and thus presumably only function as

51 single membrane channels. It is also unknown whether glycosylation is indeed a novel  
52 modification gained by chordates to prevent their innexin-homologues from forming gap  
53 junctions. Specifically, previous studies have shown that at least two non-chordate species,  
54 *Aedes aegypti* (Calkins et al., 2015) and *Caenorhabditis elegans* (Kaji et al., 2007), possess an  
55 innexin protein with an extracellular NGS that can be glycosylated. These findings raise the  
56 intriguing possibility that N-glycosylation might actually be rather common in both chordate  
57 and non-chordate innexins, and that N-glycosylation might have played an important role in the  
58 evolution of gap junction proteins.

59 Since the experimental identification of N-glycosylated proteins is technically demanding, time  
60 consuming and expensive, accurate computational methods are commonly used to identify N-  
61 linked glycosylations sites (NGS) in primary amino acid sequences (Gupta et al., 2002; Pitti et  
62 al., 2019). In this study, we used the wealth of genomic data that is now available in several  
63 public protein and genomic databases to analyze the occurrence of NGSs in non-chordate and  
64 chordate innexins in silicio. Based on our findings, we suggest a new evolutionary scenario in  
65 which a loss in innexin diversity could explain why the connexins arose *de novo* during the  
66 early chordate evolution and why connexins have completely replaced the innexins that so  
67 successfully serve diverse functions in the nervous systems of invertebrates.

68

## 69 **Results and Discussion**

70 We first screened for innexin proteins across multiple non-chordate taxa by using innexin  
71 proteins as sequence queries in BLAST searches. Only hits that fulfilled defined criteria were  
72 included in our study (for more details see Materials and Methods). In total, we collected the  
73 amino acid sequences of 1405 non-chordate innexins from 152 species across 7 higher-level  
74 taxonomic groups (ctenophores, cnidarians, molluscs, annelids, platyhelminthes, nematodes  
75 and arthropods). We subsequently searched in each of the sequences for the consensus motif  
76 for N-glycosylation (Asn-X-Ser/Thr). As the extracellular glycosylation of pannexins hinders

77 the gap junction formation (Ruan et al., 2020), we only included NGSs that are located in the  
78 extracellular loops of the innexins in our study. Surprisingly, we found that innexins with  
79 extracellular NGSs are widespread among the examined non-chordate phyla, comprising more  
80 than 80 % of the innexins in the ctenophores (Figure 1D, E, Figure 1–source data 1). The  
81 position of the NGSs within the extracellular loops as well as the residues around the N-  
82 glycosylation consensus motifs are not conserved between the phyla (Figure 1F). Within the  
83 single phyla, we found some innexin orthologs that have highly conserved NGSs and  
84 extracellular loops (Figure 1–figure supplement 1). However, we did not find any extracellular  
85 NGS that was conserved in all species within a phylum. This finding is presumably based on  
86 the phylum-specific diversification of innexins. As shown in previous studies (Abascal et al.,  
87 2013; Hasegawa et al., 2014; Moroz et al., 2014), and demonstrated in Figure 1D, innexins  
88 originated early in the metazoan evolution and have undergone diversification within the  
89 different non-chordate phyla. Thus, innexins with extracellular NGSs evolved independently  
90 numerous times within the single phyla.

91 The wide occurrence of innexins with NGSs in all non-chordate phyla (Figure 1D, E) as well  
92 as the experimentally confirmed NGSs (Calkins et al., 2015; Kaji et al., 2007) strongly suggest  
93 that a large fraction of non-chordate innexins are glycoproteins. These glycosylated innexin  
94 channels might then also not be able to form gap junction channels but rather function as non-  
95 junctional channels. However, some of the innexins with identified NGSs have previously been  
96 shown to form functional gap junction channels (Figure 1F, Figure 1–source data 3). This means  
97 that either the predicted NGSs of these innexins are not glycosylated (Apweiler, 1999) or that  
98 glycosylation does not necessarily entail the loss of gap junction function in the diverse innexins  
99 of invertebrates.

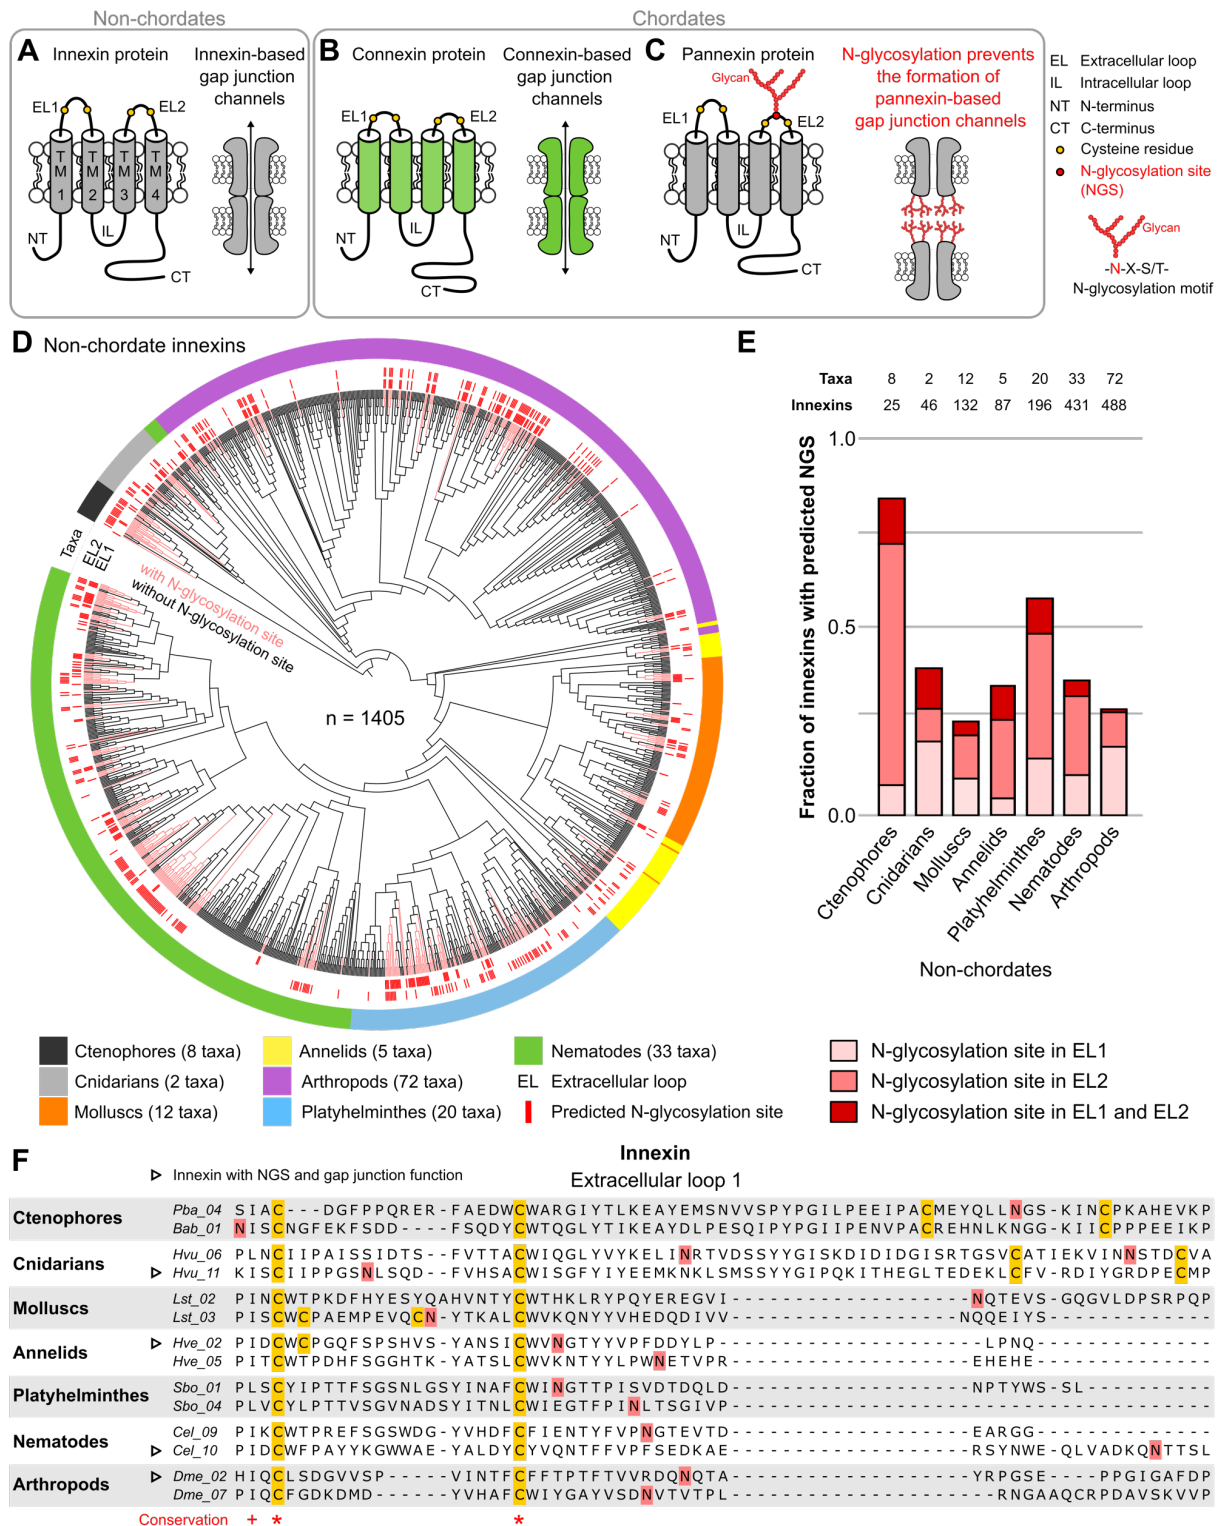

**Figure 1. Innexins with N-linked glycosylation sites are widespread among non-chordate animals.**

(A) Innexins and (B) connexins are integral membrane proteins that share a common membrane topology with four hydrophobic transmembrane domains (TM) linked by one intracellular (IL) and two extracellular loops (EL). Connexin and innexin proteins can assemble to form a hemichannel. The hemichannels of two neighboring cells can form intercellular gap junction channels that are stabilized by disulfide bonds between cysteine residues in their ELs (Dahl et al., 1991) (yellow circles). (C) The innexin homologues of vertebrates, called pannexins, are glycoproteins that contain N-linked glycosylation consensus sites (NGS) within their extracellular loops. The attachment of glycans to NGSs block the disulfide bond formation and hence prevents the proper docking of the hemichannels and the

100  
101  
102  
103  
104  
105  
106  
107  
108  
109

110 formation of pannexin-based gap junctions (Ruan et al., 2020). **(D)** Maximum likelihood phylogeny of  
111 innexin proteins from 152 non-chordate species (n = 1404 innexins). Black and red branches represent  
112 innexins without and with NGSs in the extracellular loops, respectively. The red bars in the inner circle  
113 indicate whether EL1 or EL2 contains the NGS. The colors of the outer circle represent the phylum  
114 classification of the innexins. **(E)** Fraction of innexins with NGSs in their extracellular loops in the  
115 taxonomic groups shown in **(D)**. **(F)** Representative multiple sequence alignment of the extracellular  
116 loop 1 of innexins. The alignment contains selected innexin sequences of representative species of each  
117 taxonomic group. The complete alignment including all non-chordate innexins is provided as a  
118 supplementary file (Figure 1–source data 2). Conserved residues are highlighted (\*, absolutely  
119 conserved; +, physicochemical properties are conserved). The cysteine residues (yellow) and the NGSs  
120 (red) in each EL1 are colored (note that some innexins have more than two cysteines). The identified  
121 NGSs in EL1 and EL2 of the innexins of all other non-chordate species are shown in Figure 1–figure  
122 supplement 1. Arrowheads mark innexins with NGSs that have been shown to form functional gap  
123 junction channels (Figure 1–source data 3)

124

125

126 Our findings demonstrated that non-chordate animals possess a vast diversity of innexins, with  
127 and without NGSs, and thus function either as non-junctional membrane channels or as  
128 intercellular gap junction channels. This finding is in sharp contrast to the situation in chordates,  
129 where all innexins are assumed to be glycosylated and unable to form gap junction channels  
130 (Dahl et al., 2014; Esseltine et al., 2016; Sosinsky et al., 2011). But is there really not a single  
131 chordate species that uses pannexin-based gap junctions? Up to know, extracellular NGSs were  
132 only identified in human (Ruan et al., 2020), mouse (Penuela et al., 2007), rat (Boassa et al.,  
133 2007) and zebrafish (Kurtenbach et al., 2013; Prochnow et al., 2009) pannexins. To clarify the  
134 prevalence of extracellular NGSs in chordates, we again used public protein and genomic  
135 databases to screen for innexin proteins across multiple chordate taxa. In total, we collected the  
136 amino acid sequences of 865 chordate innexins from 274 species across 9 higher-level  
137 taxonomic groups (lancelets, tunicates, lampreys, cartilaginous fish, bony fish, amphibians,  
138 reptiles, birds, and mammals) and then searched, as previously described, in the extracellular  
139 loops of each of the sequences for the consensus motif for N-glycosylation (Asn-X-Ser/Thr).

140 Our results clearly show that each single innexin in every chordate species has at least one NGS  
141 in its extracellular loops (Figure 2A, B, Figure 2–source data 1). Moreover, we show that in  
142 vertebrates the sequence of the extracellular loops as well as the positions of the glycosylation

143 motifs are highly conserved (Figure 2C-F). Among the three pannexins, conservation is  
144 particularly high in the extracellular loops of Pannexin-2. Furthermore, conservation is still seen  
145 even after the whole-genome duplication in the common ancestor of teleost fishes (Glasauer et  
146 al., 2014), an event that generally provides a source of genetic raw material for evolutionary  
147 innovation and functional divergence. Still, each single species retained their pannexins with  
148 NGSs (Figure 2F and Supplementary File 4). This is remarkable because a single mutation in  
149 the N-glycosylation motif might be sufficient to recover the ability of pannexins to form gap  
150 junction channels (Ruan et al., 2020). The surprisingly high conservation of the location and  
151 the surrounding sequences of NGSs suggests that the pannexins serve essential roles, with  
152 correspondingly high stabilizing selective pressures (Abascal et al., 2013).

153 In summary, we show that N-glycosylation is present in both non-chordate and chordate  
154 species. Already simple organisms at the beginning of the metazoan evolution attached sugar  
155 moieties to some of their innexins to presumably prevent them from forming gap junction  
156 channels. In consequence, the vertebrate pannexins did not diverge and change their function  
157 driven by the appearance of the connexins but rather originate from an innexin already equipped  
158 with NGS. This would be consistent with findings that single membrane channels formed by  
159 pannexins and innexins have the same physiological functions and are similar in their  
160 biophysical and pharmacological properties (Dahl et al., 2014).

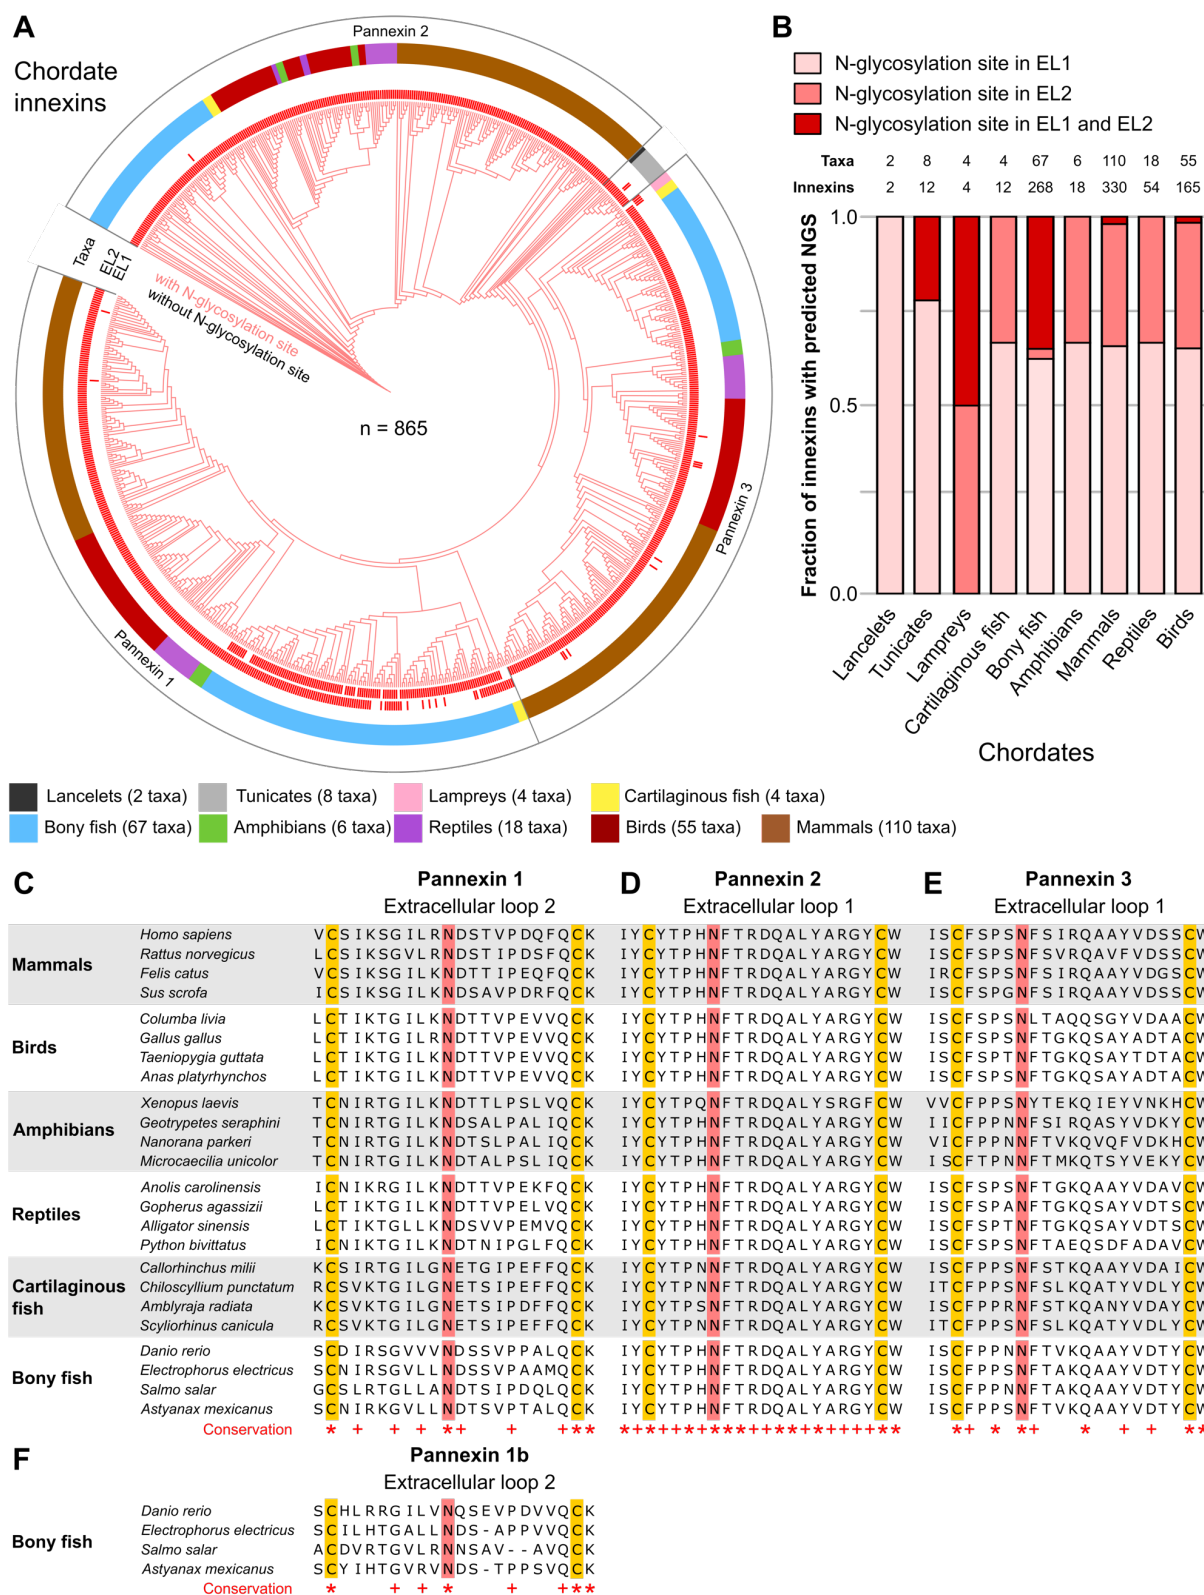

161  
 162 **Fig. 2. N-linked glycosylation of innexins is highly conserved in chordate animals.** (A) Maximum  
 163 likelihood phylogeny of innexin proteins from 274 non-chordate species (n = 865 innexins). Black and  
 164 red branches represent innexins without and with N-glycosylation consensus sites (NGS) in the  
 165 extracellular loops, respectively. Note that each innexin in every chordate species has at least one NGS.  
 166 The red bars in the inner circle indicate whether extracellular loop 1 or 2 (EL1 and EL2) contains the  
 167 NGS. The colors of the outer circle represent the phylum classification of the innexins. (B) Fraction of  
 168 innexins with NGSs in their extracellular loops (EL) in the taxonomic groups shown in (A). (C)  
 169 Representative multiple sequence alignments of the highly conserved extracellular loop 2 of Pannexin



170 1 and the extracellular loop 1 of (D) Pannexin 2 and (E) Pannexin 3 in vertebrates. (F) Representative  
171 multiple sequence alignment of the extracellular loop 2 of the duplicated Pannexin 1 in bony fish. The  
172 alignments only contain the sequences of some representative species of each taxonomic group. The  
173 complete alignment including all chordate innexins is provided as a supplementary file (Figure 2–source  
174 data 2). Conserved residues are highlighted (\*, absolutely conserved; +, physicochemical properties are  
175 conserved). The cysteine residues (yellow) and the NGSs (red) in each EL are colored. The identified  
176 NGSs in EL1 and EL2 of the innexins of all other chordate species are shown in Figure 2–source data  
177 1.  
178

179 If it is typical for invertebrates to use a great diversity of glycosylated and non-glycosylated  
180 innexins and to even form gap junctions from both (Figure 1-figure supplement 2), then the  
181 situation in the vertebrates becomes even more puzzling: Why do all vertebrates exclusively  
182 retain glycosylated innexins, why do they not form gap junction from them (Ruan et al., 2020)  
183 and instead evolved and exclusively use the new connexins for functions that could equally be  
184 fulfilled by an innexin? We suggest that looking at the early chordate evolution may solve this  
185 puzzle. The chordates are comprised of three subphyla: the lancelets, the tunicates, and the  
186 vertebrates. The lancelets represent the most basal chordate lineage that diverged before the  
187 split between tunicates and vertebrates (Putnam et al., 2008). The vertebrates split into the  
188 jawless fish (lampreys), the most ancient vertebrate group (Smith et al., 2018), and the jawed  
189 vertebrates (Figure 3B). As our previous analysis revealed, the lancelets and the lampreys as  
190 well as most of the tunicates have only one innexin. In the jawed vertebrates, we find three  
191 innexins (called pannexins) in each single species. This is expected from the two whole-genome  
192 duplications at the early vertebrate lineage leading first to Pannexin-2 and afterwards to  
193 Pannexin-1 and Pannexin-3 (Abascal et al., 2013; Fushiki et al., 2010). Only teleost fishes have  
194 a fourth pannexin generated by a whole-genome duplication event during the teleost evolution  
195 (Bond et al., 2012; Glasauer et al., 2014). The limited genetic diversity is thus in strong contrast  
196 to the rich innexin diversity within the non-chordate phyla (Figure 1C) (Abascal et al., 2013;  
197 Hasegawa et al., 2014; Moroz et al., 2014). Moreover, we identified extracellular NGSs in each  
198 of the innexins of lancelets, tunicates, and lampreys (Figure 2A, B and Figure 3A). The innexin  
199 sequences of these groups are less conserved compared to those of jawed vertebrates and the

200 position of extracellular NGSs are different in lancelets and tunicates. The most important  
201 finding is that the sequence of the only innexin of lancelets, which do not yet express connexins  
202 (Mikalsen et al., 2021; Slivko-Koltchik et al., 2019) (Figure 3D), contains a NGS in its  
203 extracellular loop 1. This suggests that the most basal chordates not only had a limited number  
204 of innexins but might also not be able to form functional gap junctions. Interestingly, at this  
205 time of the chordate evolution, the connexins arose *de novo* (Figure 1B-D) and developed into  
206 diverse gene families (up to 22 connexins in mammals and 46 connexins in bony fish)  
207 (Mikalsen et al., 2021).

208 Based on our findings, we propose that a bottleneck effect at the origin of chordates might have  
209 been crucial for the evolution of the novel connexins (Figure 3E). In this evolutionary scenario,  
210 innexins were recruited as gap junction proteins in the common cnidarian/bilaterian ancestor.  
211 While the innexins functionally diverge in cnidarians and protostomes, the last common  
212 ancestor of the deuterostomes had lost all diverse innexins and retained only one that  
213 presumably was glycosylated and did not form gap junction channels (Figure 3B). The high  
214 conservation of NGSs in the vertebrate innexins that we describe here (Figure 2C-F), their  
215 expression in every organ (Penuela et al. 2014) and their association with a variety of diseases  
216 (Esseltine et al., 2016; Penuela et al., 2014) suggest that the non-junctional innexin channels  
217 already served essential physiological functions in the basal chordates and could not be  
218 converted into gap junctions. The loss of innexin diversity on the one hand and the strict  
219 conservation of the NGSs in the remaining innexin could thus explain rather simply why the  
220 connexin family arose *de novo* and why it became the exclusive gap-junction protein in all  
221 deuterostomes although innexin-based gap junctions would have been fully capable to serve all  
222 functions (Baker et al., 2014; Bao et al., 2007; Bhattacharya et al., 2019; Lane et al., 2018; Liu  
223 et al., 2016; Phelan et al., 2001; Skerrett et al., 2017; Welzel et al., 2018; Yaksi et al., 2010) as  
224 they do so successfully in the sophisticated nervous systems of invertebrates (Calabrese et al.,  
225 2016; Hall, 2017; Kristan et al., 2005; Marder et al., 2005; Otopalik et al., 2019).

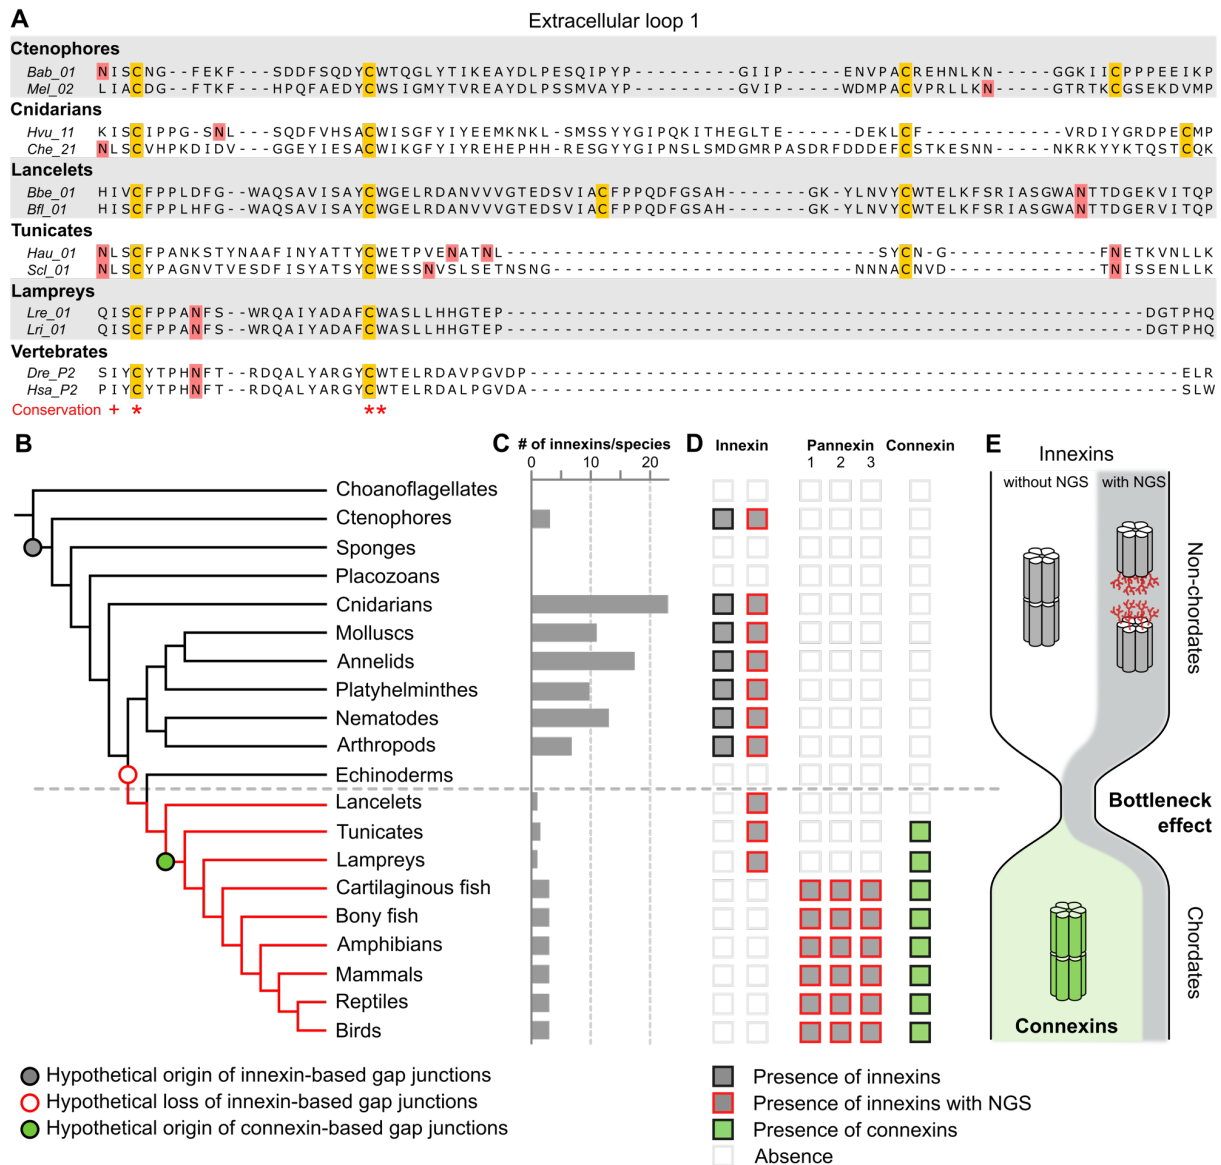

226

227

228

229

230

231

232

233

234

235

236

237

238

239

240

241

**Figure 3. A new evolutionary scenario to explain the origin and exclusive use of connexins in vertebrates.** (A) Representative multiple sequence alignment of the extracellular loop 1 of chordate and non-chordate innexins. Only extracellular loop 1 is shown as it is one of the best-conserved regions of non-chordate and chordate innexins (Yen et al., 2007). Conserved residues are highlighted (\*, absolutely conserved; +, physicochemical properties are conserved). The cysteine residues (yellow) and the NGSs (red) are colored. Note that the lanceleets and tunicates have more than two cysteine residues in extracellular loop 1, like cnidarians and ctenophores. (B) Simplified phylogenetic tree to visualize the hypothetical loss of innexin-based gap junctions and the origin of connexin-based gap junctions. Lineages that only possess innexins with extracellular NGSs are indicated by a red branch color. (C) Mean number of different innexins per species in each of the different phyla. (D) Occurrence of innexins and connexins in different metazoans. Innexins with a N-glycosylation consensus site (NGS) in their extracellular domains are present in chordates and non-chordates. Note that lanceleets only possess innexins with NGSs and lack connexins. (E) A hypothetical evolutionary scenario in which the connexin-based gap junctions evolved after innexin diversity was lost during a bottleneck event in the early chordate evolution.

## 242 **Materials and Methods**

### 243 *Database searches*

244 We used public databases to collect innexin amino acid sequences of chordate and non-chordate  
245 species. The taxonomic groups that we have analyzed in this study were constrained by the  
246 availability of publicly available genomic data. We screened for innexin proteins across  
247 multiple taxa by using diverse sequences of the innexin family (PF00876) as sequence queries  
248 in BLAST searches. All retrieved sequences were further assessed and only innexin sequences  
249 that fulfilled all the following properties were included into our analyses: (1) The sequence was  
250 already assigned to the innexin family (PF00876) or a reciprocal BLAST with the sequence hit  
251 as query against the UniProt database identified a known innexin sequence as a top hit; (2) The  
252 sequence is predicted to contain four transmembrane domains that are connected by two  
253 extracellular and one intracellular loop as well as an intracellular N- and C-terminus (see Figure  
254 1A). To clarify this, we used the TMHMM Server v2.0  
255 (<http://www.cbs.dtu.dk/services/TMHMM/>) to predict membrane topology; (3) The sequence  
256 is not fragmented or a duplicate entry. In total, we retrieved 1405 innexin protein sequences of  
257 seven non-chordate groups (phylum ctenophores, phylum cnidarians, phylum molluscs, phylum  
258 annelids, phylum plathyhelminthes, phylum nematodes and phylum arthropods) and 865  
259 sequences of nine chordate groups (subphylum lancelets, subphylum tunicates, class lampreys,  
260 class cartilaginous fish, superclass bony fish, class amphibians, class reptiles, class birds and  
261 class mammals). All innexin sequences of molluscs, annelids, plathyhelminthes, nematodes,  
262 arthropods, cartilaginous fish, bony fish, amphibians, reptiles, birds, and mammals were  
263 obtained from the protein databases at NCBI (<http://www.ncbi.nlm.nih.gov>) and UniProt  
264 (<http://www.uniprot.org>). The innexin sequences of the ctenophore species were obtained from  
265 the Neurobase genome database (<http://neurobase.rc.ufl.edu/Pleurobrachia>). The innexin  
266 sequences of the cnidarian species were obtained from UniProt and the Marimba genome  
267 database (<http://marimba.obs-vlfr.fr>). The LanceletDB database

268 (<http://genome.bucm.edu.cn/lancelet>) was used to retrieve innexin sequences of lancelets. The  
269 innexin sequences of the tunicate species were obtained from NCBI and the ANISEED database  
270 (<https://www.aniseed.cnrs.fr>). The innexin sequences of lampreys were retrieved from the  
271 NCBI and the SIMRBASE database (<https://genomes.stowers.org>). The full list of species and  
272 taxa, along with accession numbers and links to the corresponding databases can be found in  
273 Figure 1-source data 1 and Figure 2-source data 1.

#### 274 ***Identification of potential N-glycosylation sites (NGS)***

275 To identify potential N-glycosylation sites within the extracellular loops of the non-chordate  
276 and chordate innexins, we generated 16 multiple sequence alignments for each taxonomic group  
277 (seven non-chordate and nine chordate groups). For each group, we first imported all innexin  
278 protein sequences of each species into the Jalview software (version 2.11.1.4) (Waterhouse et  
279 al., 2009). The innexin sequences obtained from the UniProt database were automatically  
280 retrieved into Jalview by the UniProt sequence fetcher. The sequences obtained from other  
281 databases were manually added to Jalview. After aligning the innexin sequences with ClustalW  
282 (Thompson et al., 1994), the resulting multiple sequence alignments of each group were used  
283 to identify potential N-glycosylation consensus sites (NGS) in the extracellular domains of each  
284 innexin protein. NGSs in innexins were predicted by the NetNGlyc 1.0 Server  
285 (<http://www.cbs.dtu.dk/services/NetNGlyc/>) that uses an artificial neural network to examine  
286 the sequence context of the N-X-S/T motif. We used the following criteria to include the NGS  
287 into our analyses: (1) X in the N-X-S/T motif could be any AA except proline; (2) the potential  
288 score was  $> 0.5$  and the agreement between the nine artificial neural networks was  $\geq 5/9$ ; (3)  
289 the NGS was located in extracellular loop 1 or 2. The positions of all extracellular N-  
290 glycosylation sites are reported in Figure 1-source data 1 and Figure 2-source data 1.

291

## 292 ***Phylogenomic tree construction***

293 We visualized the incidence of innexins with N-glycosylation motif in their extracellular  
294 domains within different taxonomic groups by using phylogenetic trees. To generate a  
295 phylogenetic tree of the 1398 non-chordate and the 865 chordate innexins, respectively, we first  
296 created two global alignments including the available alignments of the seven non-chordate or  
297 the nine chordate groups. Both alignments were generated using MEGA version X (Kumar et  
298 al., 2018; Stecher et al., 2020) with the default parameters of ClustalW. Both multiple sequence  
299 alignments were then processed by the G-blocks server  
300 (<http://molevol.cmima.csic.es/castresana/Gblocks.html>) (Castresana, 2000) to automatically  
301 detect and remove poorly aligned, nonhomologous, and excessively divergent alignment  
302 columns. We reconstructed a phylogenetic tree of the non-chordate and the chordate innexins,  
303 respectively, by using the raxmlGUI 2.0 software (Edler et al., 2021). Before the phylogenetic  
304 analyses, ModelTest-NG (Darriba et al., 2020) was run on the two trimmed alignments with the  
305 default parameters to determine the best probabilistic model of sequence evolution. Both  
306 phylogenetic trees were built using the maximum likelihood (ML) method based on the JTT  
307 model and 100 bootstrap replications. The phylogenetic trees of chordate and non-chordate  
308 innexins were visualized, edited and annotated with iTOL v5 (<https://itol.embl.de>) (Letunic et  
309 al., 2021).

## 310 **Acknowledgements**

311 We thank Antje Halwas for generating the multiple sequence alignments and Andreas Möglich  
312 for inspiring discussions.

313

## 314 **Data availability**

315 All data generated or analyzed during this study are included in the manuscript and in the  
316 supporting files.

## 317 References

- 318 Abascal, F., & Zardoya, R. (2013). Evolutionary analyses of gap junction protein families.  
319 *Biochimica et Biophysica Acta (BBA) - Biomembranes*, 1828(1), 4–14. doi:  
320 10.1016/j.bbmem.2012.02.007
- 321 Alexopoulos, H., Böttger, A., Fischer, S., Levin, A., Wolf, A., Fujisawa, T., Hayakawa, S.,  
322 Gojobori, T., Davies, J. A., David, C. N., & Bacon, J. P. (2004). Evolution of gap  
323 junctions: the missing link? *Current Biology*, 14(20), R879–R880. doi:  
324 10.1016/j.cub.2004.09.067
- 325 Apweiler, R. (1999). On the frequency of protein glycosylation, as deduced from analysis of  
326 the SWISS-PROT database. *Biochimica et Biophysica Acta (BBA) - General Subjects*,  
327 1473(1), 4–8. doi: 10.1016/S0304-4165(99)00165-8
- 328 Baker, M. W., & Macagno, E. R. (2014). Control of neuronal morphology and connectivity:  
329 Emerging developmental roles for gap junctional proteins. *FEBS Letters*, 588(8), 1470–  
330 1479. doi: 10.1016/j.febslet.2014.02.010
- 331 Bao, L., Samuels, S., Locovei, S., Macagno, E. R., Muller, K. J., & Dahl, G. (2007). Innexins  
332 form two types of channels. *FEBS Letters*, 581(29), 5703–5708. doi:  
333 10.1016/j.febslet.2007.11.030
- 334 Baranova, A., Ivanov, D., Petrash, N., Pestova, A., Skoblov, M., Kelmanson, I., Shagin, D.,  
335 Nazarenko, S., Geraymovych, E., Litvin, O., Tiunova, A., Born, T. L., Usman, N.,  
336 Staroverov, D., Lukyanov, S., & Panchin, Y. (2004). The mammalian pannexin family is  
337 homologous to the invertebrate innexin gap junction proteins. *Genomics*, 83(4), 706–  
338 716. doi: 10.1016/j.ygeno.2003.09.025
- 339 Bhattacharya, A., Aghayeva, U., Berghoff, E. G., & Hobert, O. (2019). Plasticity of the  
340 electrical connectome of *C. elegans*. *Cell*, 176(5), 1174–1189.e16. doi:  
341 10.1016/j.cell.2018.12.024
- 342 Boassa, D., Ambrosi, C., Qiu, F., Dahl, G., Gaietta, G., & Sosinsky, G. (2007). Pannexin1  
343 channels contain a glycosylation site that targets the hexamer to the plasma membrane.  
344 *Journal of Biological Chemistry*, 282(43), 31733–31743. doi: 10.1074/jbc.M702422200
- 345 Bond, S. R., Wang, N., Leybaert, L., & Naus, C. C. (2012). Pannexin 1 ohnologs in the teleost  
346 lineage. *The Journal of Membrane Biology*, 245(8), 483–493. doi: 10.1007/s00232-012-  
347 9497-4
- 348 Calabrese, R. L., Norris, B. J., & Wenning, A. (2016). The neural control of heartbeat in  
349 invertebrates. *Current Opinion in Neurobiology*, 41, 68–77. doi:  
350 10.1016/j.conb.2016.08.004
- 351 Calkins, T. L., Woods-Acevedo, M. A., Hildebrandt, O., & Piermarini, P. M. (2015). The  
352 molecular and immunochemical expression of innexins in the yellow fever mosquito,  
353 *Aedes aegypti*: Insights into putative life stage- and tissue-specific functions of gap  
354 junctions. *Comparative Biochemistry and Physiology Part B: Biochemistry and*  
355 *Molecular Biology*, 183, 11–21. doi: 10.1016/j.cbpb.2014.11.013
- 356 Castresana, J. (2000). Selection of conserved blocks from multiple alignments for their use in  
357 phylogenetic analysis. *Molecular Biology and Evolution*, 17(4), 540–552. doi:  
358 10.1093/oxfordjournals.molbev.a026334
- 359 Dahl, G., Levine, E., Rabadan-Diehl, C., & Werner, R. (1991). Cell/cell channel formation  
360 involves disulfide exchange. *European Journal of Biochemistry*, 197(1), 141–144. doi:  
361 10.1111/j.1432-1033.1991.tb15892.x
- 362 Dahl, G., & Muller, K. J. (2014). Innexin and pannexin channels and their signaling. *FEBS*  
363 *Letters*, 588(8), 1396–1402. doi: 10.1016/j.febslet.2014.03.007
- 364 Darriba, Di., Posada, D., Kozlov, A. M., Stamatakis, A., Morel, B., & Flouri, T. (2020).

- 365 ModelTest-NG: A new and scalable tool for the selection of DNA and protein  
366 evolutionary models. *Molecular Biology and Evolution*, 37(1), 291–294. doi:  
367 10.1093/molbev/msz189
- 368 Edler, D., Klein, J., Antonelli, A., & Silvestro, D. (2021). raxmlGUI 2.0: A graphical interface  
369 and toolkit for phylogenetic analyses using RAxML. *Methods in Ecology and Evolution*,  
370 12(2), 373–377. doi: 10.1111/2041-210X.13512
- 371 Esseltine, J. L., & Laird, D. W. (2016). Next-generation connexin and pannexin cell biology.  
372 *Trends in Cell Biology*, 26(12), 944–955. doi: 10.1016/j.tcb.2016.06.003
- 373 Fushiki, D., Hamada, Y., Yoshimura, R., & Endo, Y. (2010). Phylogenetic and bioinformatic  
374 analysis of gap junction-related proteins, innexins, pannexins and connexins. *Biomedical*  
375 *Research*, 31(2), 133–142. doi: 10.2220/biomedres.31.133
- 376 Glasauer, S. M. K., & Neuhauss, S. C. F. (2014). Whole-genome duplication in teleost fishes  
377 and its evolutionary consequences. *Molecular Genetics and Genomics*, 289(6), 1045–  
378 1060. doi: 10.1007/s00438-014-0889-2
- 379 Gupta, R., & Brunak, S. (2002). Prediction of glycosylation across the human proteome and  
380 the correlation to protein function. *Pacific Symposium on Biocomputing. Pacific*  
381 *Symposium on Biocomputing*, 310–322. doi: 10.1142/9789812799623\_0029
- 382 Hall, D. H. (2017). Gap junctions in *C. elegans*: Their roles in behavior and development.  
383 *Developmental Neurobiology*, 77(5), 587–596. doi: 10.1002/dneu.22408
- 384 Hasegawa, D. K., & Turnbull, M. W. (2014). Recent findings in evolution and function of  
385 insect innexins. *FEBS Letters*, 588(8), 1403–1410. doi: 10.1016/j.febslet.2014.03.006
- 386 Kaji, H., Kamiie, J., Kawakami, H., Kido, K., Yamauchi, Y., Shinkawa, T., Taoka, M.,  
387 Takahashi, N., & Isobe, T. (2007). Proteomics reveals N-linked glycoprotein diversity in  
388 *Caenorhabditis elegans* and suggests an atypical translocation mechanism for integral  
389 membrane proteins. *Molecular & Cellular Proteomics*, 6(12), 2100–2109. doi:  
390 10.1074/mcp.M600392-MCP200
- 391 Kristan, W. B., Calabrese, R. L., & Friesen, W. O. (2005). Neuronal control of leech  
392 behavior. *Progress in Neurobiology*, 76(5), 279–327. doi:  
393 10.1016/j.pneurobio.2005.09.004
- 394 Kumar, S., Stecher, G., Li, M., Knyaz, C., & Tamura, K. (2018). MEGA X: Molecular  
395 evolutionary genetics analysis across computing platforms. *Molecular Biology and*  
396 *Evolution*, 35(6), 1547–1549. doi: 10.1093/molbev/msy096
- 397 Kurtenbach, S., Prochnow, N., Kurtenbach, S., Klooster, J., Zoidl, C., Dermietzel, R.,  
398 Kamermans, M., & Zoidl, G. (2013). Pannexin1 channel proteins in the zebrafish retina  
399 have shared and unique properties. *PLoS ONE*, 8(10), e77722. doi:  
400 10.1371/journal.pone.0077722
- 401 Lane, B. J., Kick, D. R., Wilson, D. K., Nair, S. S., & Schulz, D. J. (2018). Dopamine  
402 maintains network synchrony via direct modulation of gap junctions in the crustacean  
403 cardiac ganglion. *ELife*, 7. doi: 10.7554/eLife.39368
- 404 Letunic, I., & Bork, P. (2021). Interactive Tree Of Life (iTOL) v5: an online tool for  
405 phylogenetic tree display and annotation. *Nucleic Acids Research*, 49(W1), W293–  
406 W296. doi: 10.1093/nar/gkab301
- 407 Liu, Q., Yang, X., Tian, J., Gao, Z., Wang, M., Li, Y., & Guo, A. (2016). Gap junction  
408 networks in mushroom bodies participate in visual learning and memory in *Drosophila*.  
409 *ELife*, 5. doi: 10.7554/eLife.13238
- 410 Maeda, S., Nakagawa, S., Suga, M., Yamashita, E., Oshima, A., Fujiyoshi, Y., & Tsukihara,  
411 T. (2009). Structure of the connexin 26 gap junction channel at 3.5 Å resolution. *Nature*,  
412 458(7238), 597–602. doi: 10.1038/nature07869



- 413 Marder, E., Bucher, D., Schulz, D. J., & Taylor, A. L. (2005). Invertebrate central pattern  
414 generation moves along. *Current Biology*, *15*(17), R685–R699. doi:  
415 10.1016/j.cub.2005.08.022
- 416 Michalski, K., Syrjanen, J. L., Henze, E., Kumpf, J., Furukawa, H., & Kawate, T. (2020). The  
417 Cryo-EM structure of pannexin 1 reveals unique motifs for ion selection and inhibition.  
418 *ELife*, *9*. doi: 10.7554/eLife.54670
- 419 Mikalsen, S.-O., Kongsstovu, S. í, & Tausen, M. (2021). Connexins during 500 million  
420 years—from cyclostomes to mammals. *International Journal of Molecular Sciences*  
421 *2021*, Vol. 22, Page 1584, *22*(4), 1584. doi: 10.3390/IJMS22041584
- 422 Moroz, L. L., Kocot, K. M., Citarella, M. R., Dosung, S., Norekian, T. P., Povolotskaya, I. S.,  
423 Grigorenko, A. P., Dailey, C., Berezikov, E., Buckley, K. M., Ptitsyn, A., Reshetov, D.,  
424 Mukherjee, K., Moroz, T. P., Bobkova, Y., Yu, F., Kapitonov, V. V., Jurka, J., Bobkov,  
425 Y. V., ... Kohn, A. B. (2014). The ctenophore genome and the evolutionary origins of  
426 neural systems. *Nature*, *510*(7503), 109–114. doi: 10.1038/nature13400
- 427 Oshima, A., Tani, K., & Fujiyoshi, Y. (2016). Atomic structure of the innexin-6 gap junction  
428 channel determined by cryo-EM. *Nature Communications*, *7*, 13681. doi:  
429 10.1038/ncomms13681
- 430 Otopalik, A. G., Lane, B., Schulz, D. J., & Marder, E. (2019). Innexin expression in  
431 electrically coupled motor circuits. *Neuroscience Letters*, *695*, 19–24. doi:  
432 10.1016/j.neulet.2017.07.016
- 433 Panchin, Y., Kelmanson, I., Matz, M., Lukyanov, K., Usman, N., & Lukyanov, S. (2000). A  
434 ubiquitous family of putative gap junction molecules. *Current Biology*, *10*(13), R473–  
435 R474. doi: 10.1016/S0960-9822(00)00576-5
- 436 Penuela, S., Bhalla, R., Gong, X.-Q., Cowan, K. N., Celetti, S. J., Cowan, B. J., Bai, D., Shao,  
437 Q., & Laird, D. W. (2007). Pannexin 1 and pannexin 3 are glycoproteins that exhibit  
438 many distinct characteristics from the connexin family of gap junction proteins. *Journal*  
439 *of Cell Science*, *120*(21), 3772–3783. doi: 10.1242/jcs.009514
- 440 Penuela, S., Harland, L., Simek, J., & Laird, D. W. (2014). Pannexin channels and their links  
441 to human disease. *Biochemical Journal*, *461*(3), 371–381. doi: 10.1042/BJ20140447
- 442 Penuela, S., Simek, J., & Thompson, R. J. (2014). Regulation of pannexin channels by post-  
443 translational modifications. *FEBS Letters*, *588*(8), 1411–1415. doi:  
444 10.1016/j.febslet.2014.01.028
- 445 Pereda, A. E., & Macagno, E. (2017). Electrical transmission: Two structures, same  
446 functions? *Developmental Neurobiology*, *77*(5), 517–521. doi: 10.1002/dneu.22488
- 447 Phelan, P., & Starich, T. A. (2001). Innexins get into the gap. *BioEssays*, *23*(5), 388–396. doi:  
448 10.1002/bies.1057
- 449 Pitti, T., Chen, C.-T., Lin, H.-N., Choong, W.-K., Hsu, W.-L., & Sung, T.-Y. (2019). N-  
450 GlyDE: a two-stage N-linked glycosylation site prediction incorporating gapped  
451 dipeptides and pattern-based encoding. *Scientific Reports*, *9*(1), 15975. doi:  
452 10.1038/s41598-019-52341-z
- 453 Prochnow, N., Hoffmann, S., Vroman, R., Klooster, J., Bunse, S., Kamermans, M.,  
454 Dermietzel, R., & Zoidl, G. (2009). Pannexin1 in the outer retina of the zebrafish, *Danio*  
455 *rerio*. *Neuroscience*, *162*(4), 1039–1054. doi: 10.1016/j.neuroscience.2009.04.064
- 456 Putnam, N. H., Butts, T., Ferrier, D. E. K., Furlong, R. F., Hellsten, U., Kawashima, T.,  
457 Robinson-Rechavi, M., Shoguchi, E., Terry, A., Yu, J.-K., Benito-Gutiérrez, E.,  
458 Dubchak, I., Garcia-Fernández, J., Gibson-Brown, J. J., Grigoriev, I. V., Horton, A. C.,  
459 de Jong, P. J., Jurka, J., Kapitonov, V. V., ... Rokhsar, D. S. (2008). The amphioxus  
460 genome and the evolution of the chordate karyotype. *Nature*, *453*(7198), 1064–1071.

- 461 doi: 10.1038/nature06967
- 462 Ruan, Z., Orozco, I. J., Du, J., & Lü, W. (2020). Structures of human pannexin 1 reveal ion  
463 pathways and mechanism of gating. *Nature*, 584(7822), 646–651. doi: 10.1038/s41586-  
464 020-2357-y
- 465 Sanchez-Pupo, R., Johnston, D., & Penuela, S. (2018). N-glycosylation regulates pannexin 2  
466 localization but is not required for interacting with pannexin 1. *International Journal of*  
467 *Molecular Sciences*, 19(7), 1837. doi: 10.3390/ijms19071837
- 468 Skerrett, I. M., & Williams, J. B. (2017). A structural and functional comparison of gap  
469 junction channels composed of connexins and innexins. *Developmental Neurobiology*,  
470 77(5), 522–547. doi: 10.1002/dneu.22447
- 471 Slivko-Koltchik, G. A., Kuznetsov, V. P., & Panchin, Y. V. (2019). Are there gap junctions  
472 without connexins or pannexins? *BMC Evolutionary Biology*, 19(1), 5–12. doi:  
473 10.1186/s12862-019-1369-4
- 474 Smith, J. J., Timoshevskaya, N., Ye, C., Holt, C., Keinath, M. C., Parker, H. J., Cook, M. E.,  
475 Hess, J. E., Narum, S. R., Lamanna, F., Kaessmann, H., Timoshevskiy, V. A.,  
476 Waterbury, C. K. M., Saraceno, C., Wiedemann, L. M., Robb, S. M. C., Baker, C.,  
477 Eichler, E. E., Hockman, D., ... Amemiya, C. T. (2018). The sea lamprey germline  
478 genome provides insights into programmed genome rearrangement and vertebrate  
479 evolution. *Nature Genetics*, 50(2), 270–277. doi: 10.1038/s41588-017-0036-1
- 480 Sosinsky, G. E., Boassa, D., Dermietzel, R., Duffy, H. S., Laird, D. W., MacVicar, B., Naus,  
481 C. C., Penuela, S., Scemes, E., Spray, D. C., Thompson, R. J., Zhao, H.-B., & Dahl, G.  
482 (2011). Pannexin channels are not gap junction hemichannels. *Channels*, 5(3), 193–197.  
483 doi: 10.4161/chan.5.3.15765
- 484 Stecher, G., Tamura, K., & Kumar, S. (2020). Molecular evolutionary genetics analysis  
485 (MEGA) for macOS. *Molecular Biology and Evolution*, 37(4), 1237–1239. doi:  
486 10.1093/molbev/msz312
- 487 Thompson, J. D., Higgins, D. G., & Gibson, T. J. (1994). CLUSTAL W: Improving the  
488 sensitivity of progressive multiple sequence alignment through sequence weighting,  
489 position-specific gap penalties and weight matrix choice. *Nucleic Acids Research*,  
490 22(22), 4673–4680. doi: 10.1093/nar/22.22.4673
- 491 Waterhouse, A. M., Procter, J. B., Martin, D. M. A., Clamp, M., & Barton, G. J. (2009).  
492 Jalview Version 2-A multiple sequence alignment editor and analysis workbench.  
493 *Bioinformatics*, 25(9), 1189–1191. doi: 10.1093/bioinformatics/btp033
- 494 Welzel, G., & Schuster, S. (2018). Long-term potentiation in an innexin-based electrical  
495 synapse. *Scientific Reports*, 8(1), 12579. doi: 10.1038/s41598-018-30966-w
- 496 Yaksi, E., & Wilson, R. I. (2010). Electrical coupling between olfactory glomeruli. *Neuron*,  
497 67(6), 1034–1047. doi: 10.1016/j.neuron.2010.08.041
- 498 Yen, M. R., & Saier, M. H. (2007). Gap junctional proteins of animals: The innexin/pannexin  
499 superfamily. *Progress in Biophysics and Molecular Biology*, 94(1–2), 5–14. doi:  
500 10.1016/j.pbiomolbio.2007.03.006
- 501

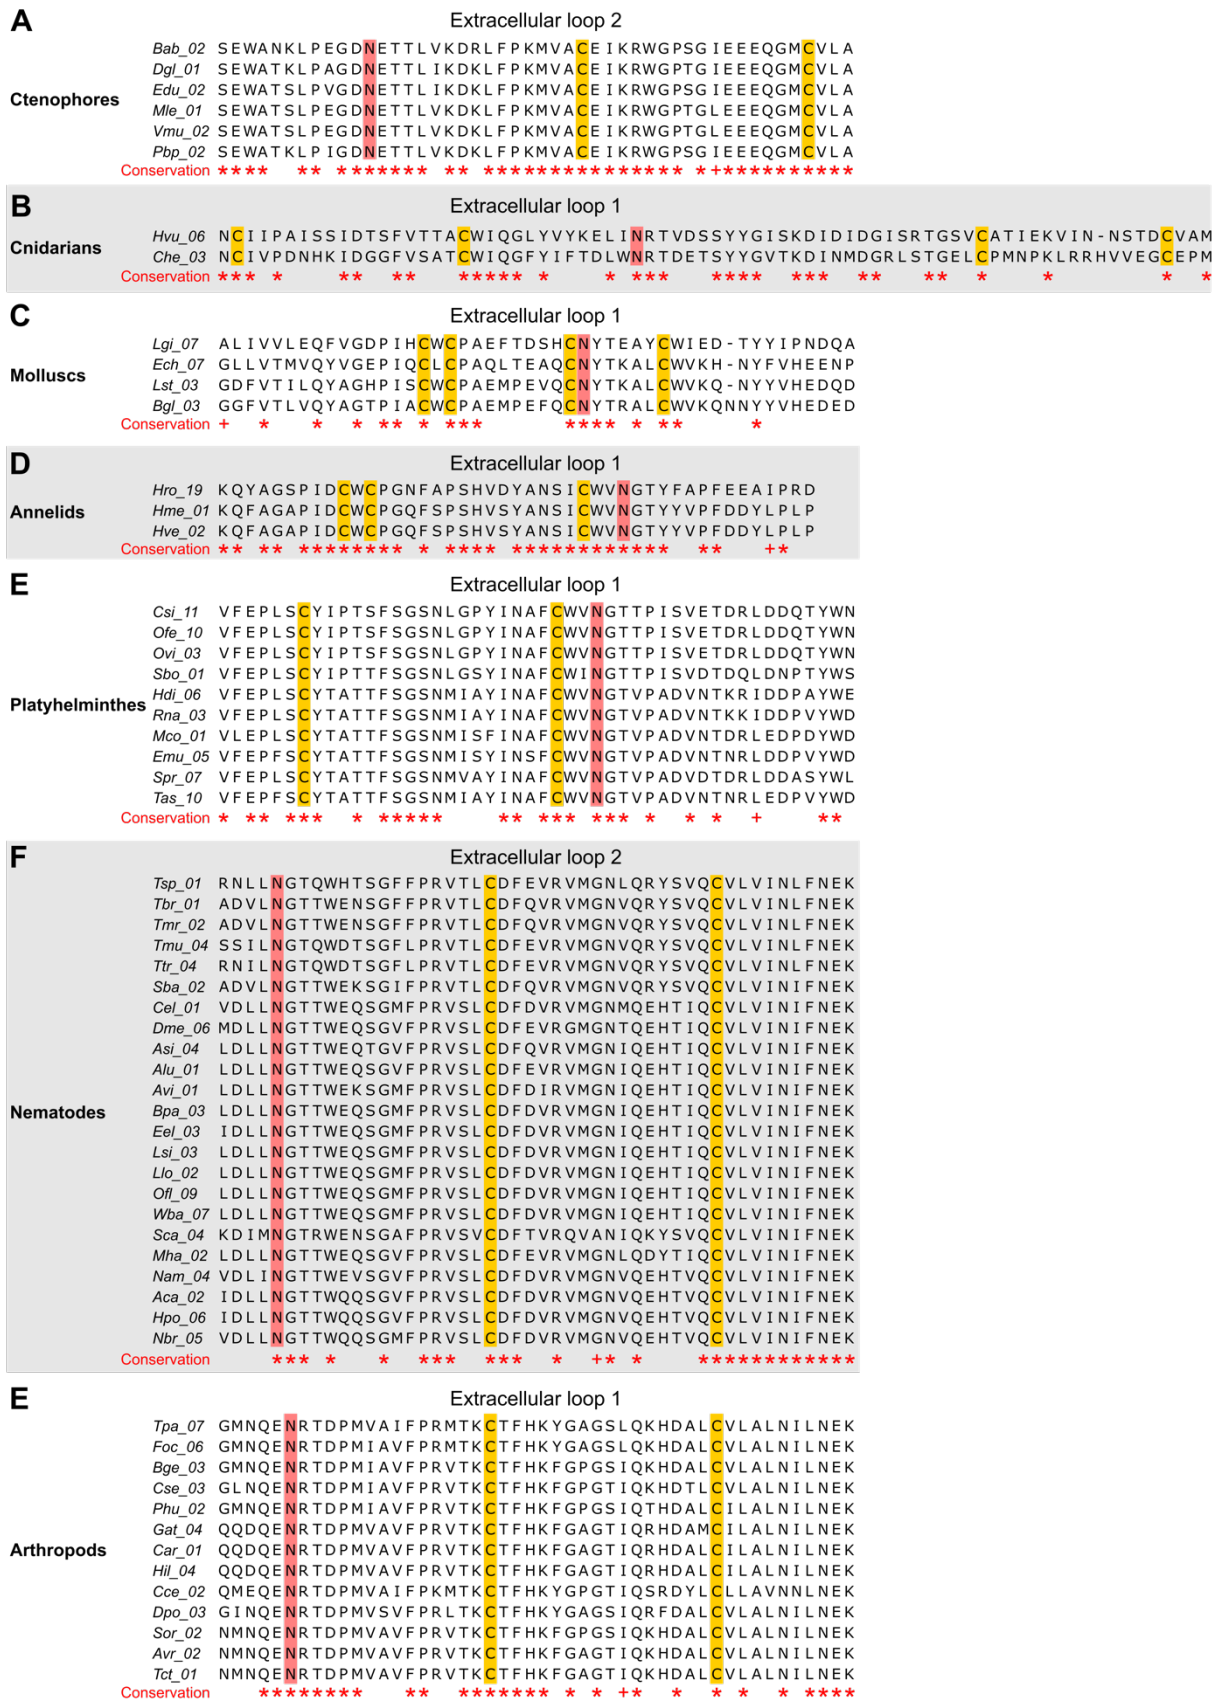

**Figure 1—figure supplement 1.** The N-linked glycosylation sites (NGS) in the extracellular loops of innexins are conserved in some orthologs. The multiple sequence alignments show innexin orthologs in (A) ctenophores, (B) cnidarians, (C) molluscs, (D) annelids, (E) platyhelminthes, (F) nematodes and (E) arthropods that have highly conserved NGSs in their extracellular loop 1 or 2. Note that we did not find any extracellular NGS that was conserved in all species within a phylum. Conserved residues are

highlighted (\*, absolutely conserved; +, physicochemical properties are conserved). The cysteine residues (yellow) and the NGSs (red) in each EL are coloured. The identified NGSs in EL1 and EL2 of the innexins of all other non-chordate species are shown in Supplementary File 1.
